# Supplementary material for: Ecological traits, not evolutionary history, predict climate vulnerability of global terrestrial vertebrates
Source: Research Square preprint supplement (doi:10.21203/rs.3.rs-6280290/v1), 2025-04-02
Supplement: Supplementary file 1 [file 79f16fac24717ecbdf194738.pdf]

Table

**Table 1. The number of species projected to lose all suitable habitat due to climate change**

|        | Amphibians  | Reptiles     | Birds      | Mammals     |
|--------|-------------|--------------|------------|-------------|
| RCP2.6 | 309 (5.9%)  | 489 (5.5%)   | 93 (1.2%)  | 229 (5.4%)  |
| RCP4.5 | 456 (8.7%)  | 686(7.7%)    | 150 (1.9%) | 312 (7.4%)  |
| RCP6.0 | 495 (9.4%)  | 742 (8.4%)   | 180 (2.3%) | 346 (8.2%)  |
| RCP8.5 | 676 (12.9%) | 1042 (11.7%) | 261(3.3%)  | 460 (10.9%) |

Note: Percentages in the brackets were calculated as the number of species projected to lose all suitable habitat divided by the total number of species modeled in this study for each taxonomic group: 5,253 amphibians, 8,871 reptiles, 7,856 birds, and 4,222 mammals.
